# Supplementary material for: Metabolomics As a Tool for the Characterization of Drug-Resistant Epilepsy
Source: PubMed Central journal article supplement (PMC5591409; doi:10.3389/fneur.2017.00459), 2017-09-04
Supplement: table_1.pdf [file table_1.pdf]

Table 1S. Comparative table of the discriminant metabolites resulting from the analysis of the S-plot and VIP list of the multivariate models (C vs R, C vs NR and R vs NR). Amount of + indicates the class with higher or lower concentration of the different metabolites.

| <b>Metabolites</b>         | <b>C</b> | <b>R</b> | <b>NR</b> |
|----------------------------|----------|----------|-----------|
| <b>Citrate</b>             | +++      | ++       | +         |
| <b>Lactate</b>             | +++      | ++       | +         |
| <b>Glucose</b>             | +++      | ++       | +         |
| <b>Glutamate</b>           | ++       | +        | ++        |
| <b>Scyllo-Inositol</b>     | +        | +++      | +         |
| <b>2-OH-Butyr/Valerate</b> | +        | ++       | +++       |
| <b>3-OH-Butyrate</b>       | +        | ++       | +++       |
| <b>Acetoacetate</b>        | +        | ++       | +++       |
| <b>Acetate</b>             | +        | ++       | +++       |
| <b>Acetone</b>             | +        | ++       | +++       |
| <b>Alanine</b>             | +        | +        | ++        |
| <b>Choline</b>             | +        | ++       | ++        |
